# Supplementary material for: Coronary Plaque Characteristics in Patients With Diabetes Mellitus Who Presented With Acute Coronary Syndromes
Source: PubMed Central journal article supplement — J Am Heart Assoc. 2018 Jul 13;7(14):e009245. doi: 10.1161/JAHA.118.009245 (PMC6064844; doi:10.1161/jaha.118.009245), 2018-07-13
Supplement: JAH3-7-e009245-s001.pdf [file JAH3-7-e009245-s001.pdf]

# **SUPPLEMENTAL MATERIAL**

**Table S1. Characteristics of the non-culprit plaques of the culprit vessel.**

|                                       | <b>DM group<br/>(n=29)</b> | <b>Non-DM group<br/>(n=79)</b> | <b><i>P</i> Value<br/>#</b> |
|---------------------------------------|----------------------------|--------------------------------|-----------------------------|
| Maximal lipid arc, degree             | 248.9 ± 83.9               | 179.9 ± 58.3                   | <b>0.006</b>                |
| Mean lipid arc, degree                | 190.8 ± 50.3               | 144.1 ± 35.3                   | <b>0.001</b>                |
| Lipid length, mm                      | 7.6 ± 6.6                  | 5.7 ± 4.0                      | 0.253                       |
| Lipid index                           | 1400.0 ± 1061.9            | 865.9 ± 744.2                  | <b>0.025</b>                |
| Thinnest FCT, µm                      | 103.3 ± 56.2               | 140.7 ± 70.0                   | <b>0.013</b>                |
| Minimal lumen area, mm <sup>2</sup>   | 2.34 ± 0.86                | 2.81 ± 1.30                    | 0.066                       |
| Reference lumen area, mm <sup>2</sup> | 7.07 ± 3.23                | 7.68 ± 3.14                    | 0.196                       |
| Area stenosis, %                      | 64.4 ± 12.0                | 63.3 ± 8.7                     | 0.978                       |
| Lipid-rich plaque                     | 15 (51.7)                  | 34 (43.0)                      | 0.295                       |
| TCFA                                  | 5 (17.2)                   | 5 (6.3)                        | <b>0.031</b>                |
| Plaque rupture                        | 1 (3.4)                    | 5 (6.3)                        | 0.687                       |
| Macrophage accumulation               | 18 (62.1)                  | 39 (49.4)                      | 0.434                       |
| Microvessels                          | 12 (41.4)                  | 27 (34.2)                      | 0.515                       |
| Cholesterol crystals                  | 9 (31.0)                   | 15 (19.0)                      | 0.288                       |
| Calcification                         | 16 (55.2)                  | 35 (44.3)                      | 0.920                       |
| Spotty calcium                        | 6 (20.7)                   | 17 (21.5)                      | 0.810                       |
| Thrombus                              | 6 (20.7)                   | 13 (16.5)                      | 0.507                       |

Generalized estimating equations were applied for fitting general- and generalized linear models. Data are presented as count (%) or mean ± SD. #Adjusted for differences in baseline characteristics.

FCT = fibrous cap thickness; TCFA = thin-cap fibroatheroma.

**Table S2. Comparison of culprit plaque characteristics based on HbA1C level.**

|                                       | A) High HbA1C<br>DM (A1C ≥8%)<br>(n=31) | B) Low HbA1C<br>DM (A1C <8%)<br>(n=51) | C) Non-DM<br>(n=227) | <i>P</i> Value # |        |        |        |
|---------------------------------------|-----------------------------------------|----------------------------------------|----------------------|------------------|--------|--------|--------|
|                                       |                                         |                                        |                      | Overall          | A vs B | A vs C | B vs C |
| Maximal lipid arc, degree             | 233.9 ± 93.4                            | 275.5 ± 70.0                           | 246.9 ± 91.7         | 0.430            |        |        |        |
| Mean lipid arc, degree                | 181.2 ± 73.7                            | 200.6 ± 49.0                           | 184.6 ± 59.6         | 0.734            |        |        |        |
| Lipid length, mm                      | 8.7 ± 6.1                               | 7.9 ± 3.7                              | 8.1 ± 6.4            | 0.944            |        |        |        |
| Lipid index                           | 1777.9 ± 1529.9                         | 1544.4 ± 707.8                         | 1581.6 ± 1337.9      | 0.845            |        |        |        |
| Thinnest FCT, µm                      | 103.7 ± 79.3                            | 90.9 ± 48.8                            | 97.9 ± 64.0          | 0.590            |        |        |        |
| Minimal lumen area, mm <sup>2</sup>   | 1.75 ± 1.86                             | 1.60 ± 1.05                            | 1.85 ± 1.45          | 0.779            |        |        |        |
| Reference lumen area, mm <sup>2</sup> | 6.75 ± 2.85                             | 6.59 ± 2.92                            | 7.33 ± 3.09          | 0.359            |        |        |        |
| Area stenosis, %                      | 73.8 ± 20.6                             | 75.4 ± 12.0                            | 73.9 ± 16.8          | 0.899            |        |        |        |
| Lipid-rich plaque                     | 20 (64.5)                               | 31 (60.8)                              | 102 (44.9)           | <b>0.042</b>     | 0.798  | 0.062  | 0.052  |
| TCFA                                  | 13 (41.9)                               | 12 (23.5)                              | 55 (24.2)            | 0.179            |        |        |        |
| Plaque rupture                        | 10 (32.3)                               | 18 (35.3)                              | 69 (30.4)            | 0.803            |        |        |        |
| Macrophage accumulation               | 20 (64.5)                               | 33 (64.7)                              | 102 (44.9)           | <b>0.025</b>     | 0.975  | 0.064  | 0.026  |
| Microvessels                          | 9 (29.0)                                | 18 (35.3)                              | 78 (34.4)            | 0.878            |        |        |        |

|                      |           |           |            |       |
|----------------------|-----------|-----------|------------|-------|
| Cholesterol crystals | 7 (22.6)  | 20 (39.2) | 64 (28.2)  | 0.465 |
| Calcification        | 15 (48.4) | 30 (58.8) | 97 (42.7)  | 0.500 |
| Spotty calcium       | 7 (22.6)  | 10 (19.6) | 35 (15.4)  | 0.487 |
| Thrombus             | 17 (54.8) | 30 (58.8) | 116 (51.1) | 0.352 |

---

Generalized linear model for categorical variables and general linear model for continuous variables were applied. Data are presented as number (%) or mean  $\pm$  SD. Thirteen patients in DM group were excluded from the analysis due to lack of HbA1C data.

#Adjusted for differences in baseline characteristics.

FCT = fibrous cap thickness; TCFA = thin-cap fibroatheroma.

**Table S3. Comparison of non-culprit plaque characteristics of the culprit vessel based on HbA1C level.**

|                                       | A) High HbA1C<br>DM (A1C ≥8%)<br>(n=9) | B) Low HbA1C<br>DM (A1C <8%)<br>(n=18) | C) Non-DM<br>(n=79) | <i>P</i> Value # |        |        |        |
|---------------------------------------|----------------------------------------|----------------------------------------|---------------------|------------------|--------|--------|--------|
|                                       |                                        |                                        |                     | Overall          | A vs B | A vs C | B vs C |
| Maximal lipid arc, degree             | 304.7 ± 79.2                           | 221.1 ± 74.6                           | 179.9 ± 58.3        | <b>&lt;0.001</b> | 0.038  | <0.001 | 0.089  |
| Mean lipid arc, degree                | 228.8 ± 39.8                           | 171.9 ± 45.2                           | 144.1 ± 35.3        | <b>&lt;0.001</b> | 0.016  | <0.001 | 0.054  |
| Lipid length, mm                      | 7.4 ± 4.2                              | 7.6 ± 7.8                              | 5.7 ± 4.0           | 0.598            |        |        |        |
| Lipid index                           | 1813.8 ± 1165.6                        | 1193.2 ± 1003.7                        | 865.9 ± 744.2       | 0.079            |        |        |        |
| Thinnest FCT, µm                      | 90.6 ± 41.1                            | 109.6 ± 63.5                           | 140.7 ± 70.0        | 0.056            |        |        |        |
| Minimal lumen area, mm <sup>2</sup>   | 2.42 ± 1.54                            | 2.31 ± 0.87                            | 2.81 ± 1.30         | 0.143            |        |        |        |
| Reference lumen area, mm <sup>2</sup> | 7.06 ± 3.22                            | 7.04 ± 3.51                            | 7.68 ± 3.14         | 0.591            |        |        |        |
| Area stenosis, %                      | 63.9 ± 14.5                            | 64.1 ± 11.6                            | 63.3 ± 8.7          | 0.975            |        |        |        |
| Lipid-rich plaque                     | 5 (55.6)                               | 10 (55.6)                              | 34 (43.0)           | 0.288            |        |        |        |
| TCFA                                  | 2 (22.2)                               | 3 (16.7)                               | 5 (6.3)             | 0.144            |        |        |        |
| Plaque rupture                        | 1 (11.1)                               | 0 (0.0)                                | 5 (6.3)             | 0.322            |        |        |        |
| Macrophage accumulation               | 4 (44.4)                               | 13 (72.2)                              | 39 (49.4)           | 0.183            |        |        |        |
| Microvessels                          | 4 (44.4)                               | 7 (38.9)                               | 27 (34.2)           | 0.684            |        |        |        |

|                      |          |           |           |       |
|----------------------|----------|-----------|-----------|-------|
| Cholesterol crystals | 1 (11.1) | 7 (38.9)  | 15 (19.0) | 0.146 |
| Calcification        | 4 (44.4) | 10 (55.6) | 35 (44.3) | 0.733 |
| Spotty calcium       | 2 (22.2) | 4 (22.2)  | 17 (21.5) | 0.987 |
| Thrombus             | 1 (11.1) | 5 (27.8)  | 13 (16.5) | 0.462 |

---

Generalized estimating equations were applied for fitting general- and generalized linear models. Data are presented as count (%) or mean  $\pm$  SD.

#Adjusted for differences in baseline characteristics.

FCT = fibrous cap thickness; TCFA = thin-cap fibroatheroma.
